# Supplementary material for: Structural insights into novel therapeutic deep eutectic systems with capric acid using 1D, 2D NMR and DSC techniques with superior gut permeability
Source: PubMed Central journal article supplement — RSC Adv. 2024 May 7;14(21):14793–806. doi: 10.1039/d4ra01469c (PMC11075621; doi:10.1039/d4ra01469c), 2024-05-07

## **Structural Insights into Novel Therapeutic Deep Eutectic Systems with Capric Acid**

Bayan Alkhawaja, Faisal Al-Akayleh\*, Jihad Nasereddin, Muhammad Kamran, Tim Woodman, Zaid Al-Rubaye, Nidal Qinna, Mayas Al-Rimawi

### Table of Contents

|                                                             |          |
|-------------------------------------------------------------|----------|
| <b><i>Supplementary figures</i></b> .....                   | <b>1</b> |
| <b><i>NMR spectra of the individual compounds</i></b> ..... | <b>4</b> |

**Supplementary figures**

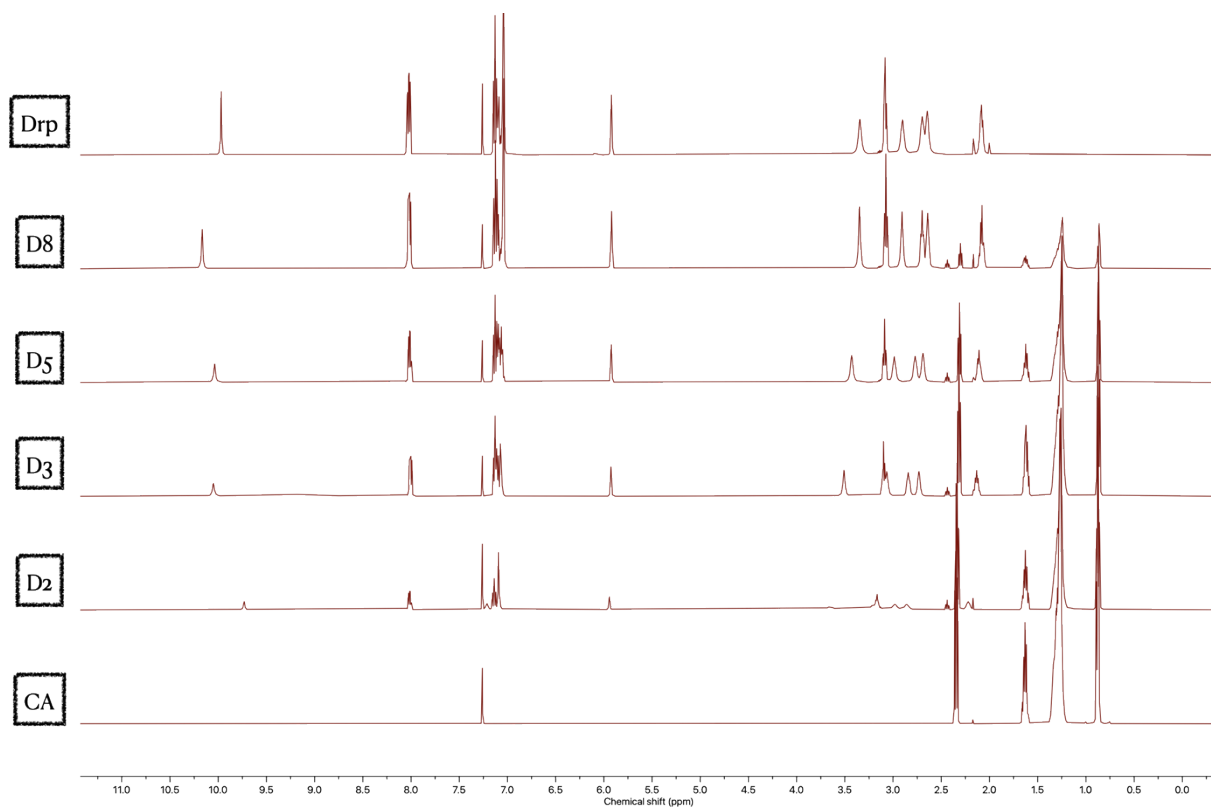

**Figure S1.** NMR spectra of Drp-CA eutectic mixtures in  $\text{CDCl}_3$  solvent. A-  $^1\text{H}$  NMR of Drp and CA binary mixtures with decreasing molar ratio of CA.

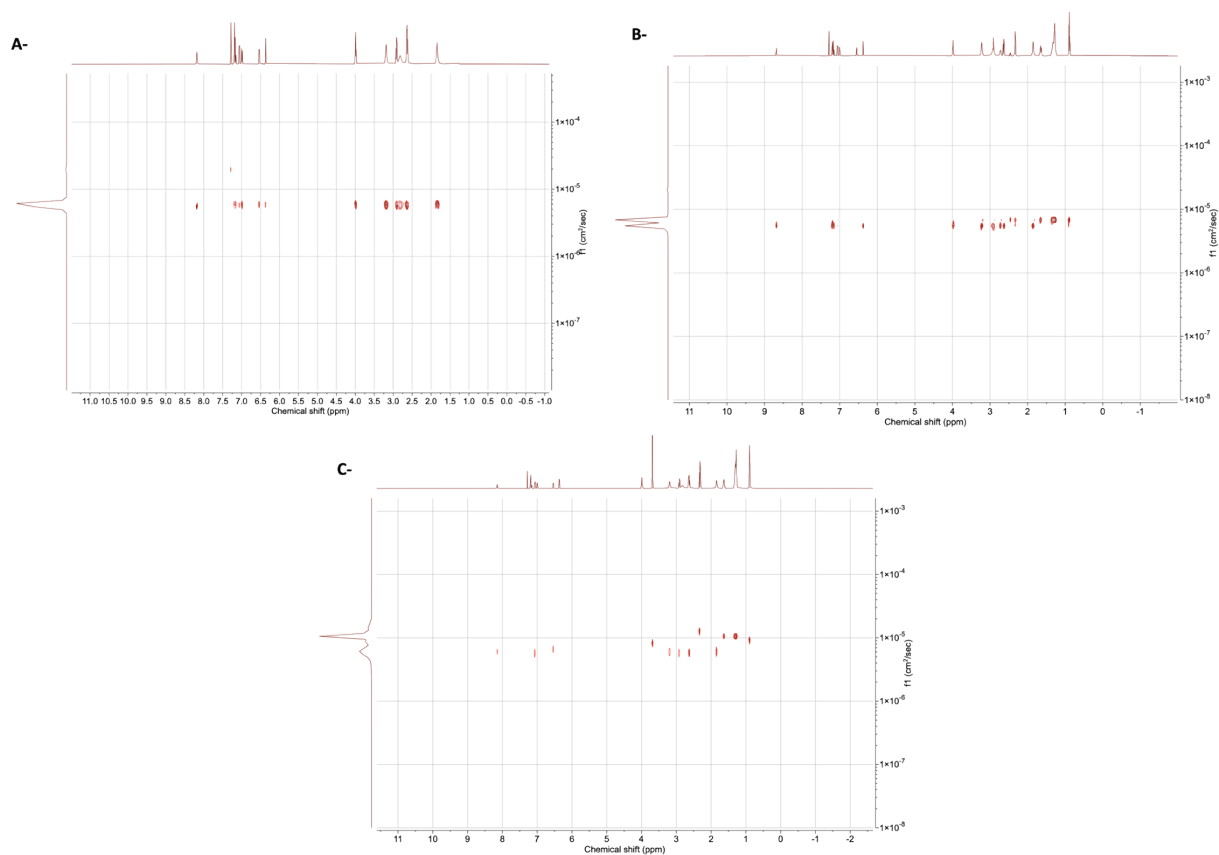

**Figure S2.** DOSY  $^1\text{H}$  spectra of A- Arp, B- Eutectic 1:1 mixture of Arp and CA and C- Binary 1:1 mixture of Arp and MC. The solvent was  $\text{CDCl}_3$ .

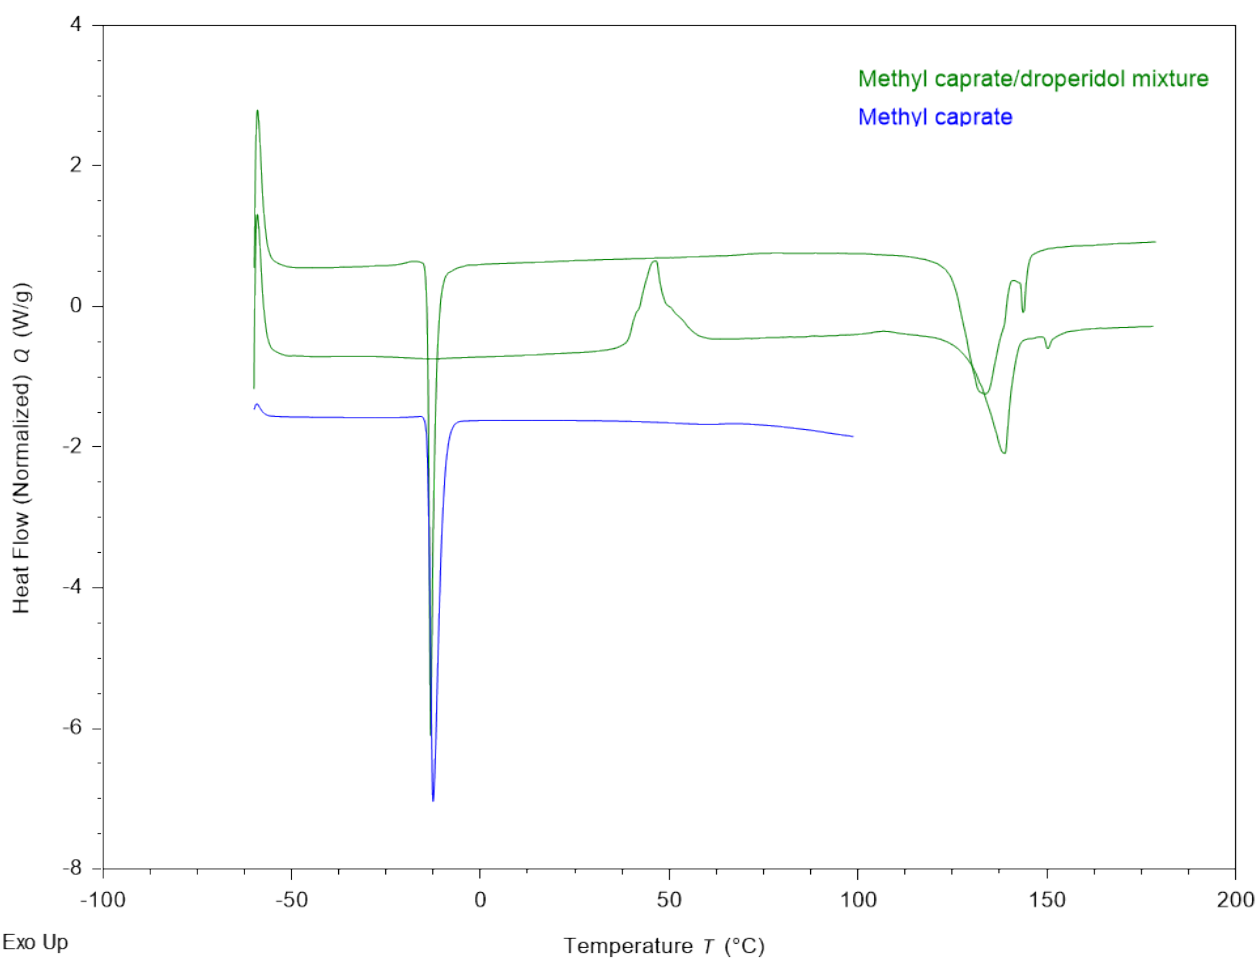

**Figure S3.** DSC thermograms of methyl caprate, and a Drpl/MC (1:1 mixture) (top: 1<sup>st</sup> heating cycle, bottom: 2<sup>nd</sup> heating cycle)

# NMR spectra of the individual compounds

## 1- Droperidol

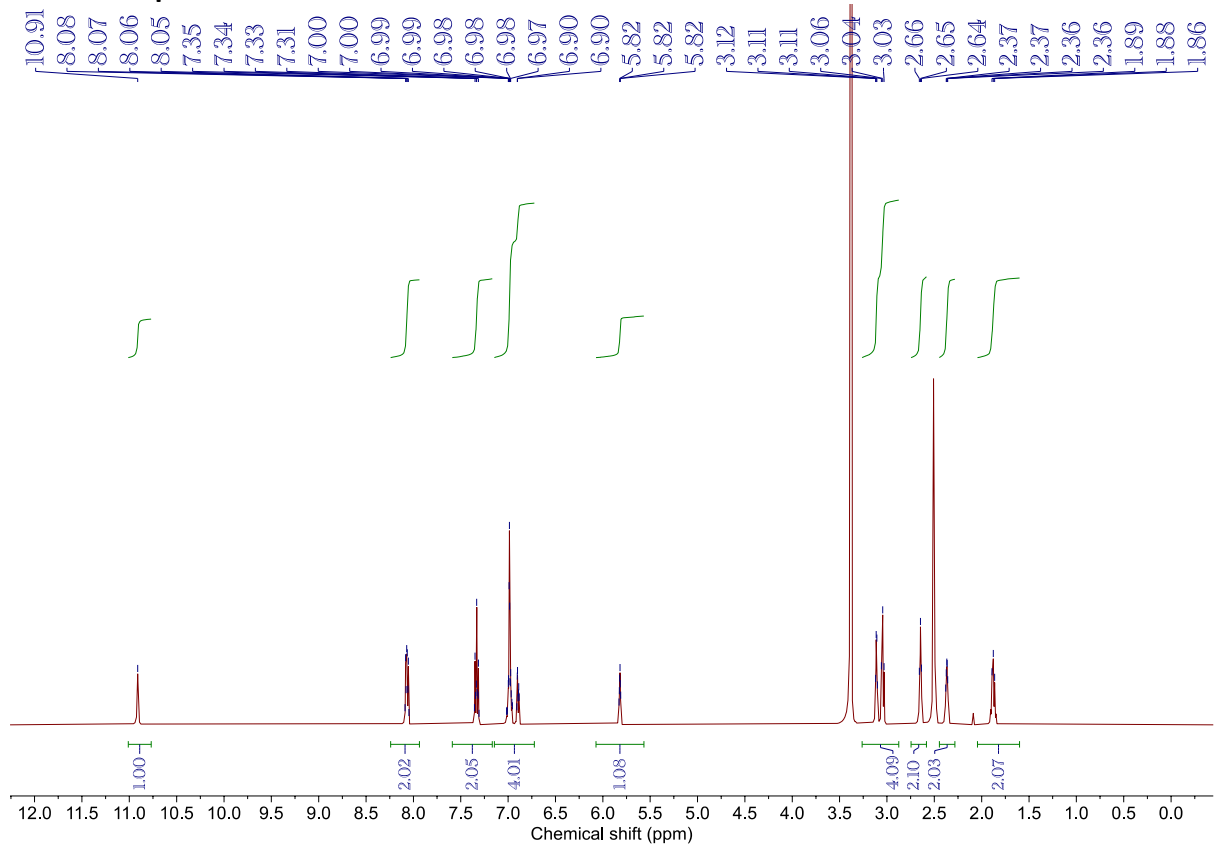

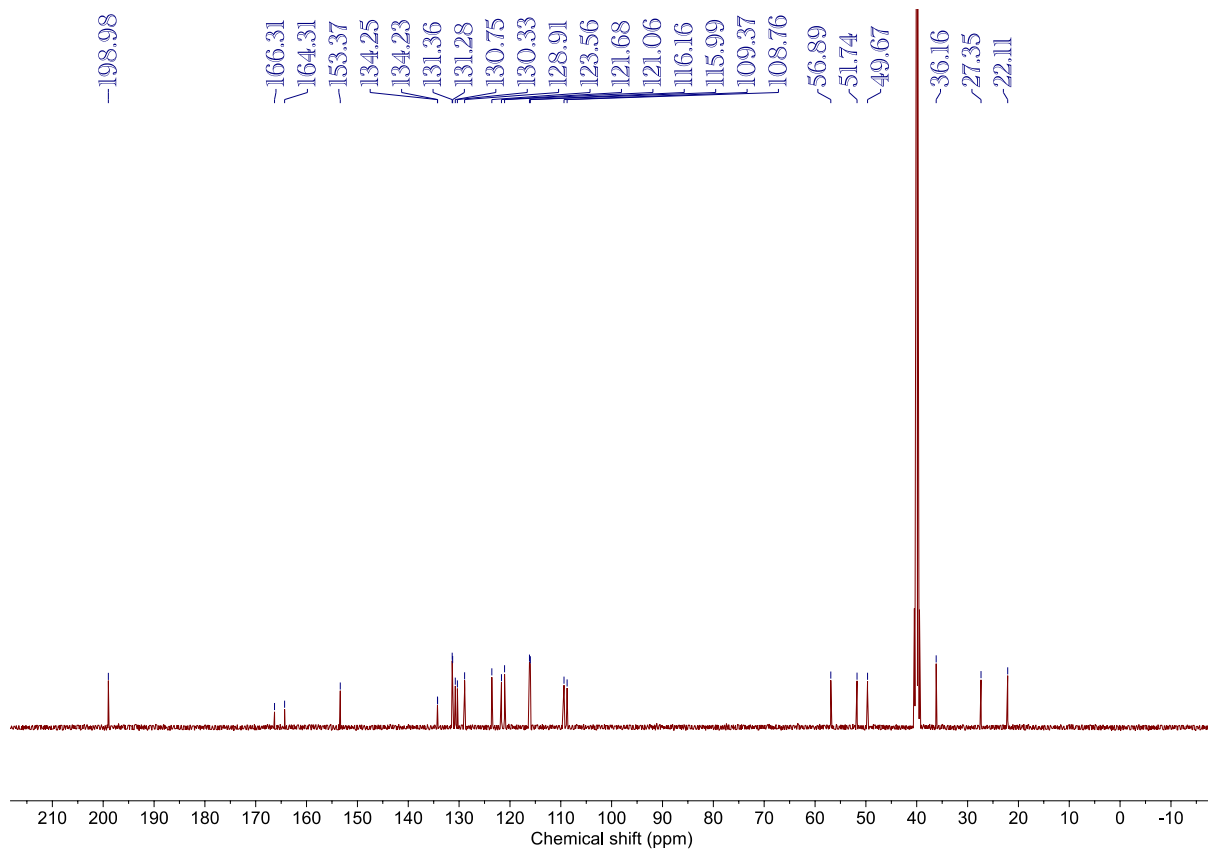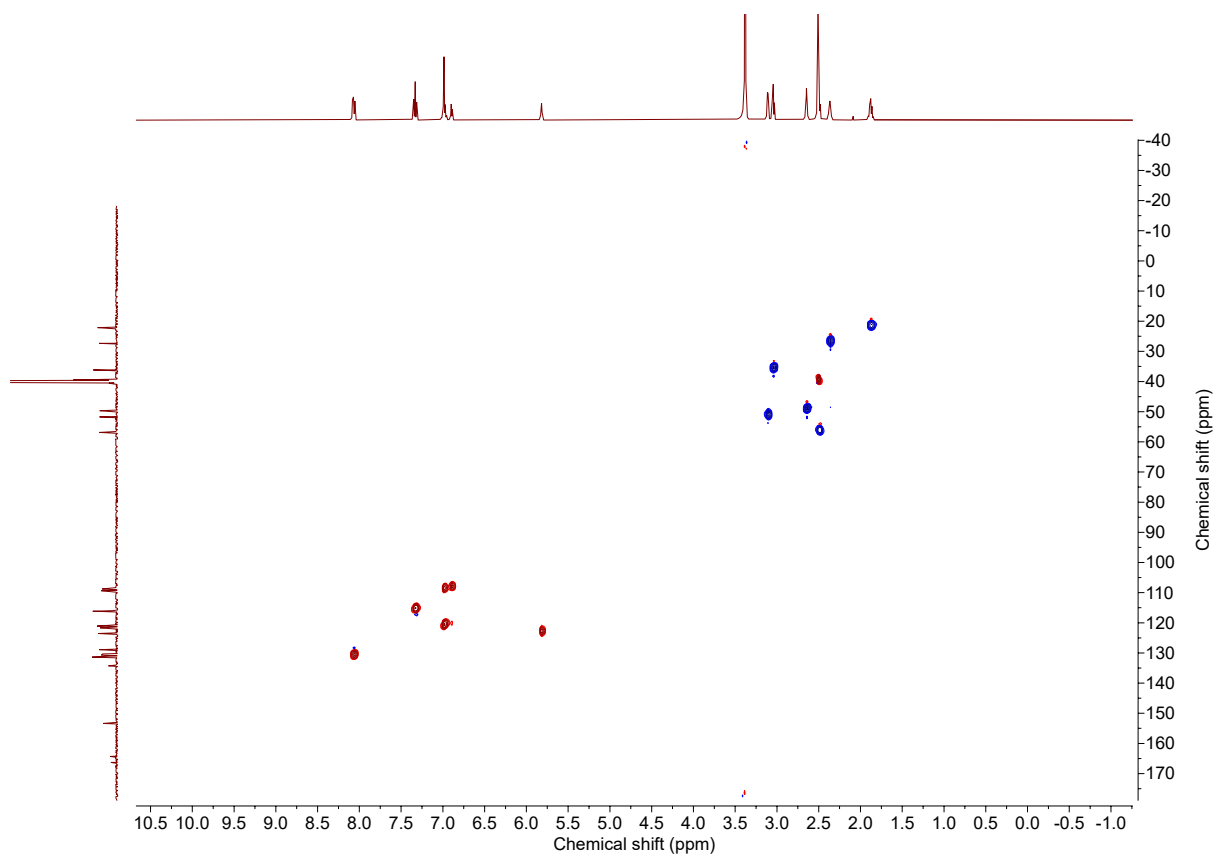

# 2- Aripiprazole

Aug24-2022-ba436 Ari CDCl3 7 mg.10.fid

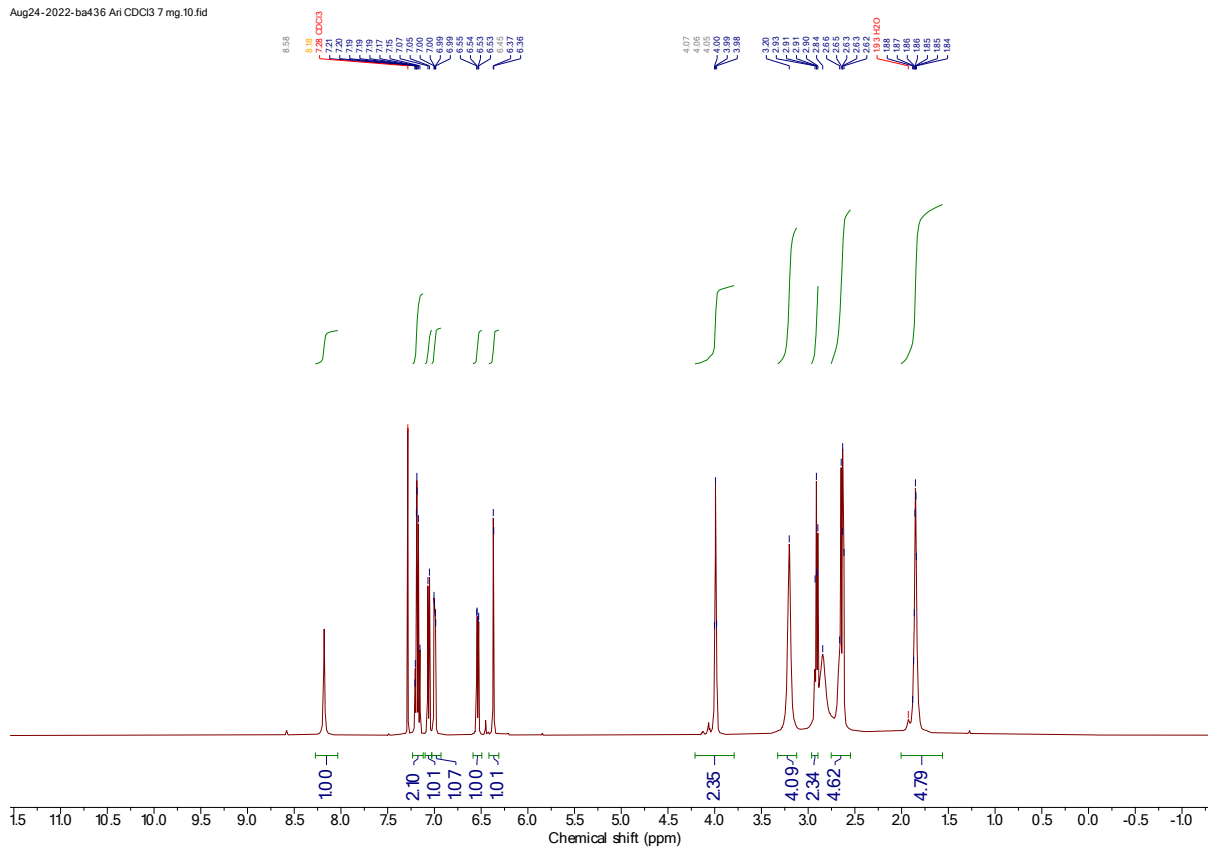

Aug24-2022-ba436 Ari CDCl3 7 mg.11.fid

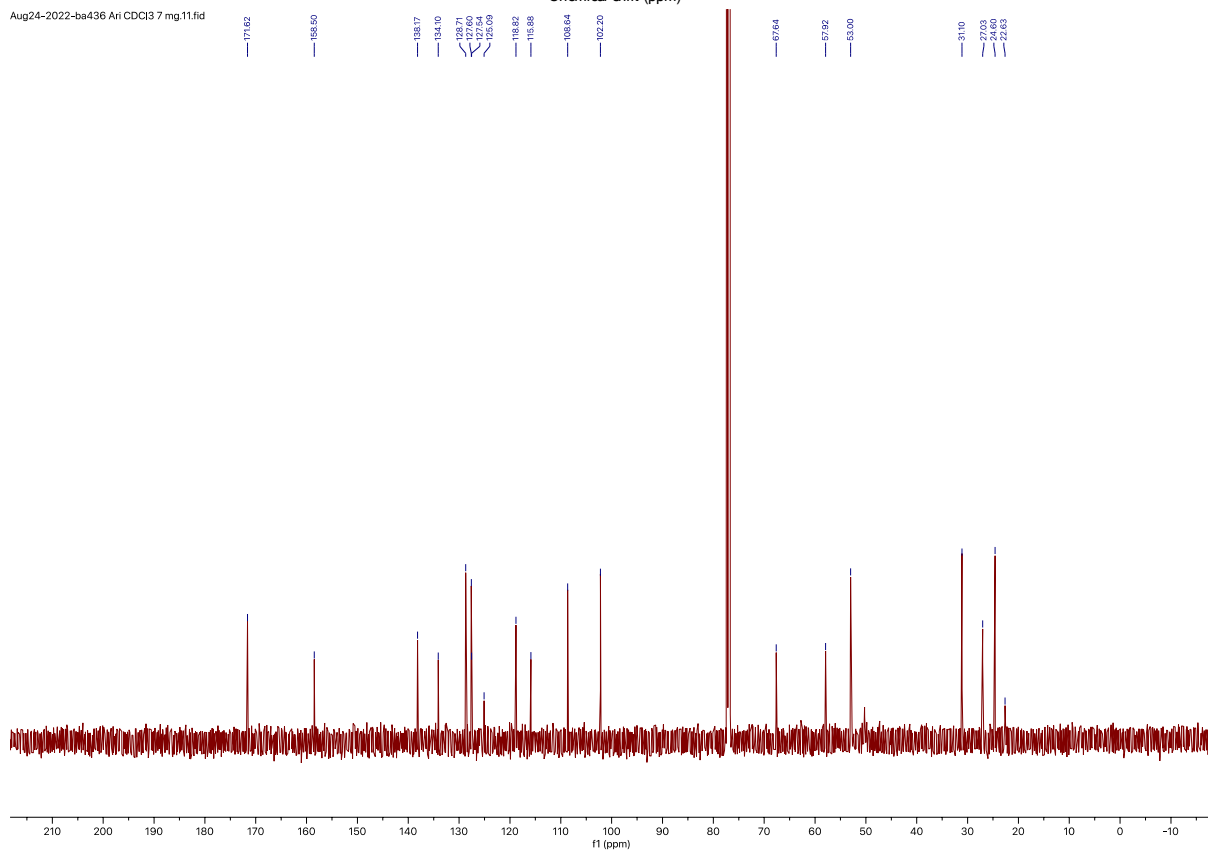

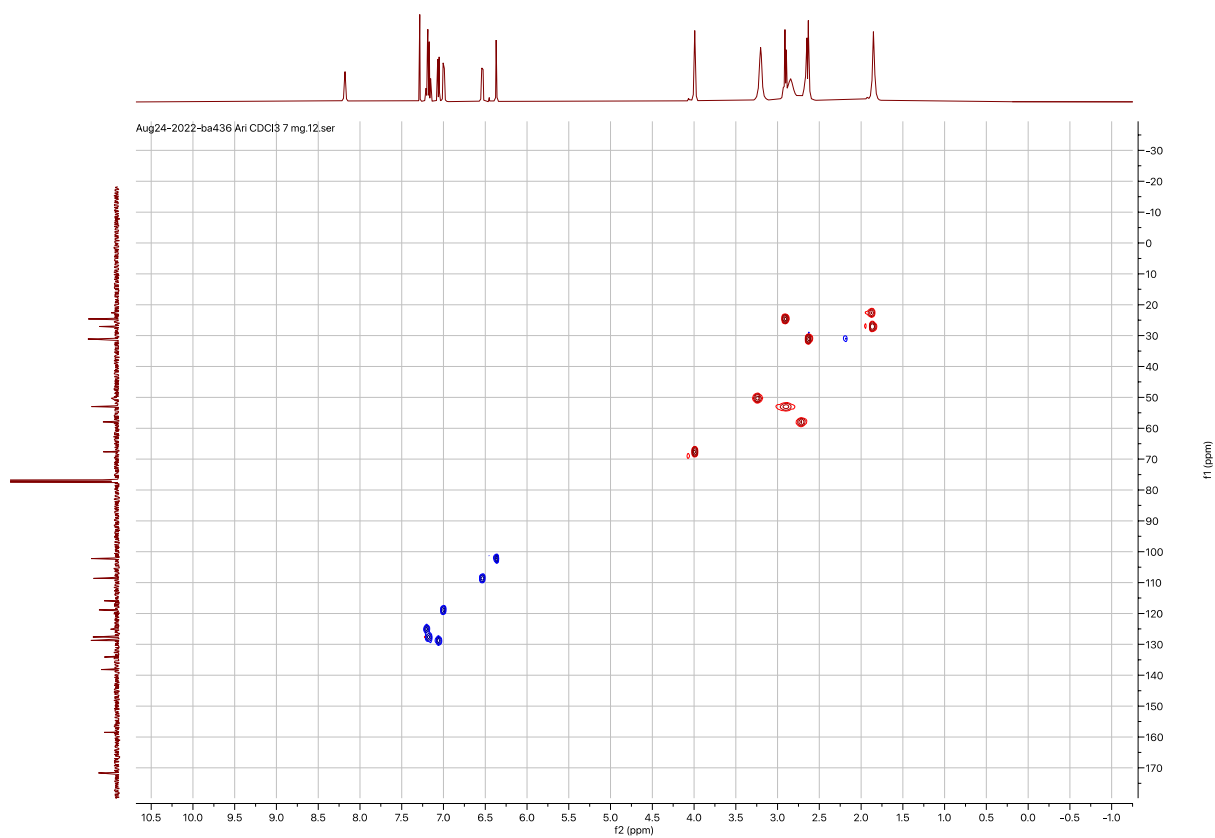

3- Capric acid

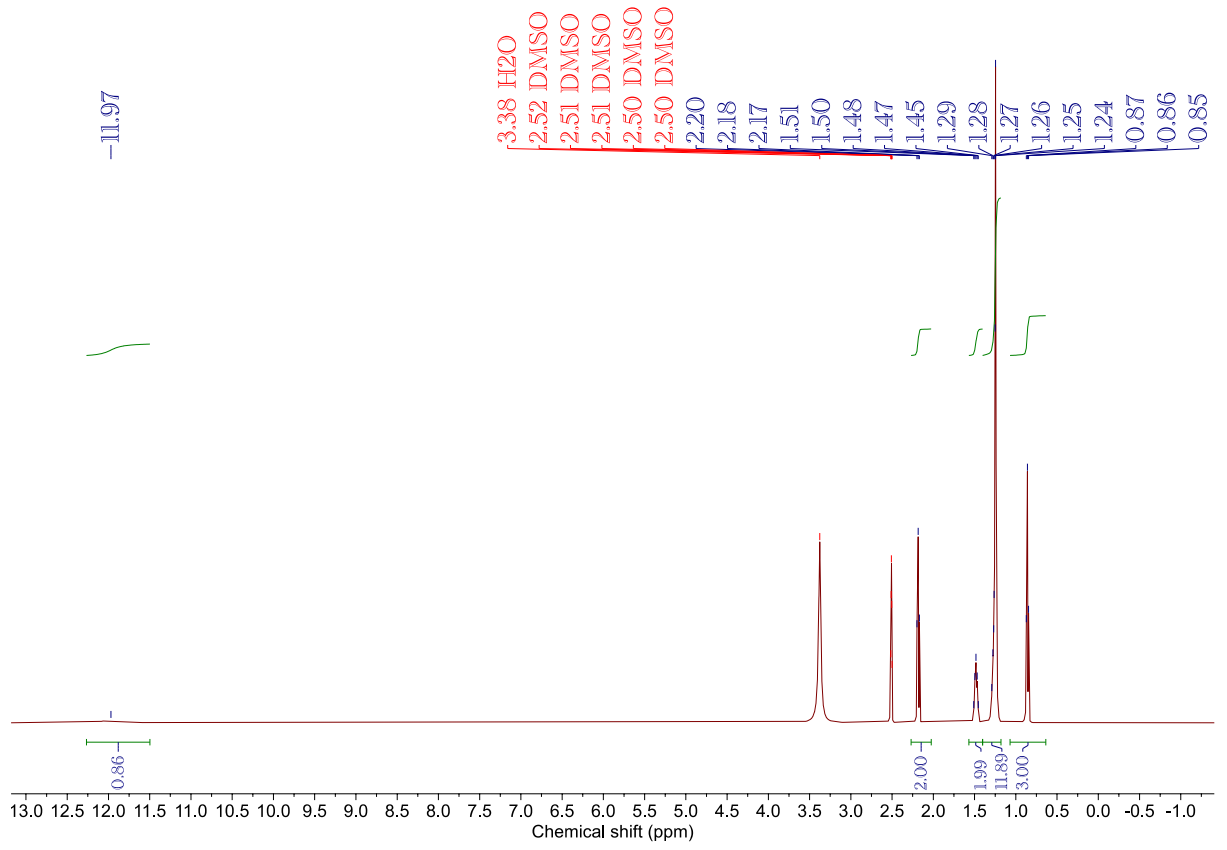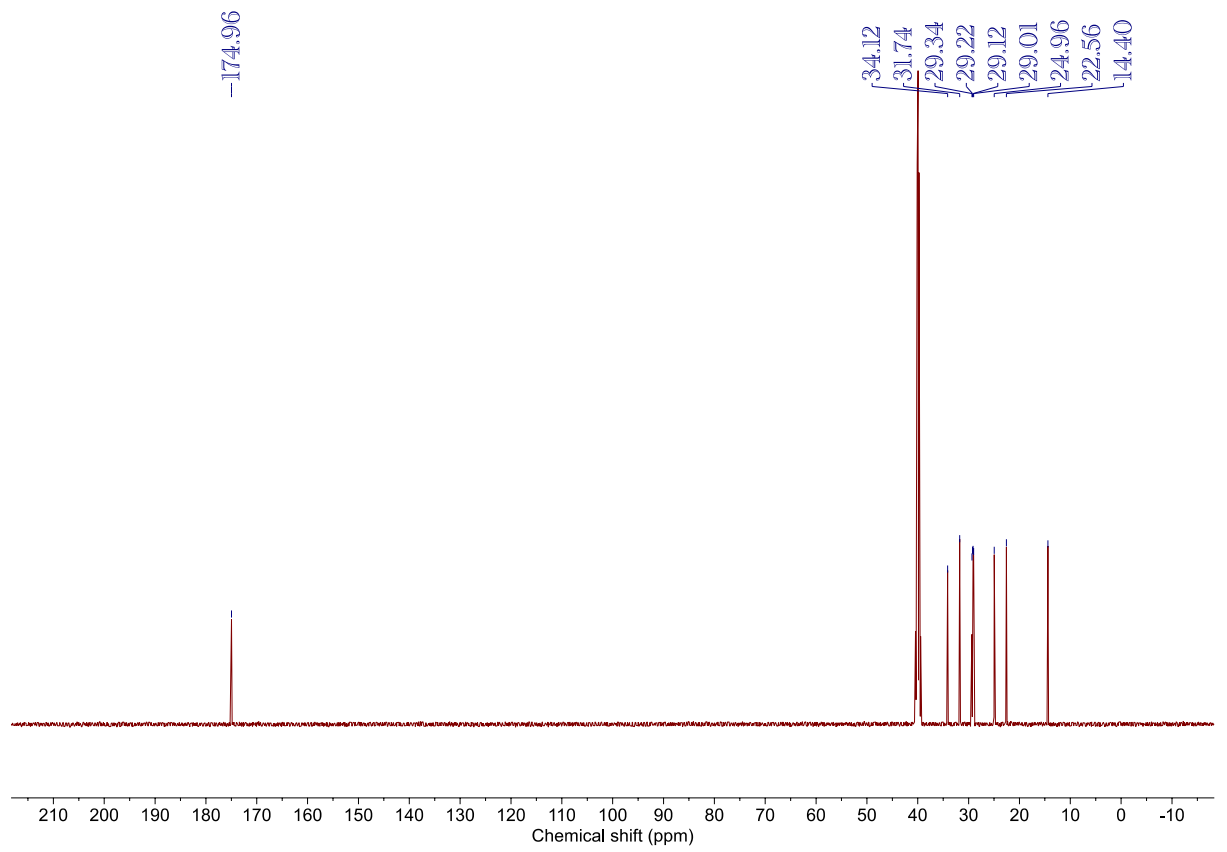



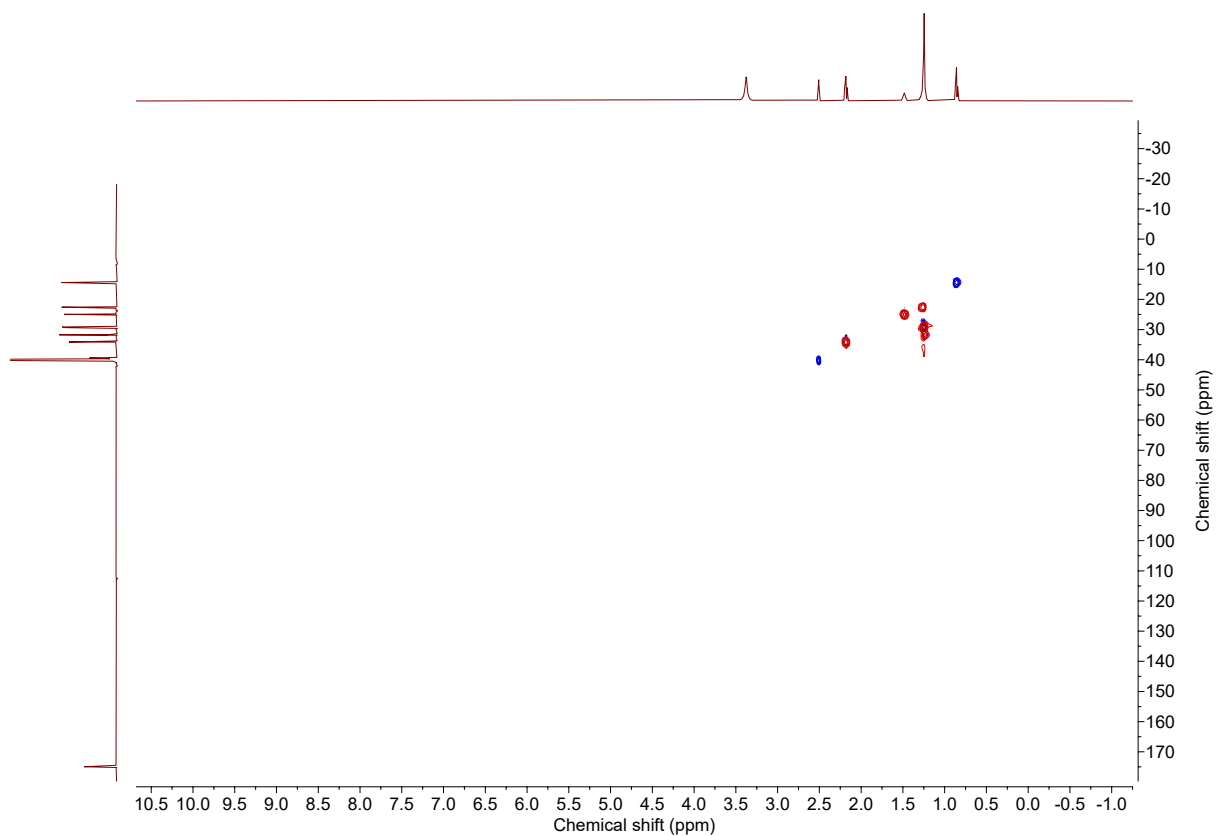

#### 4- Methyl caprate

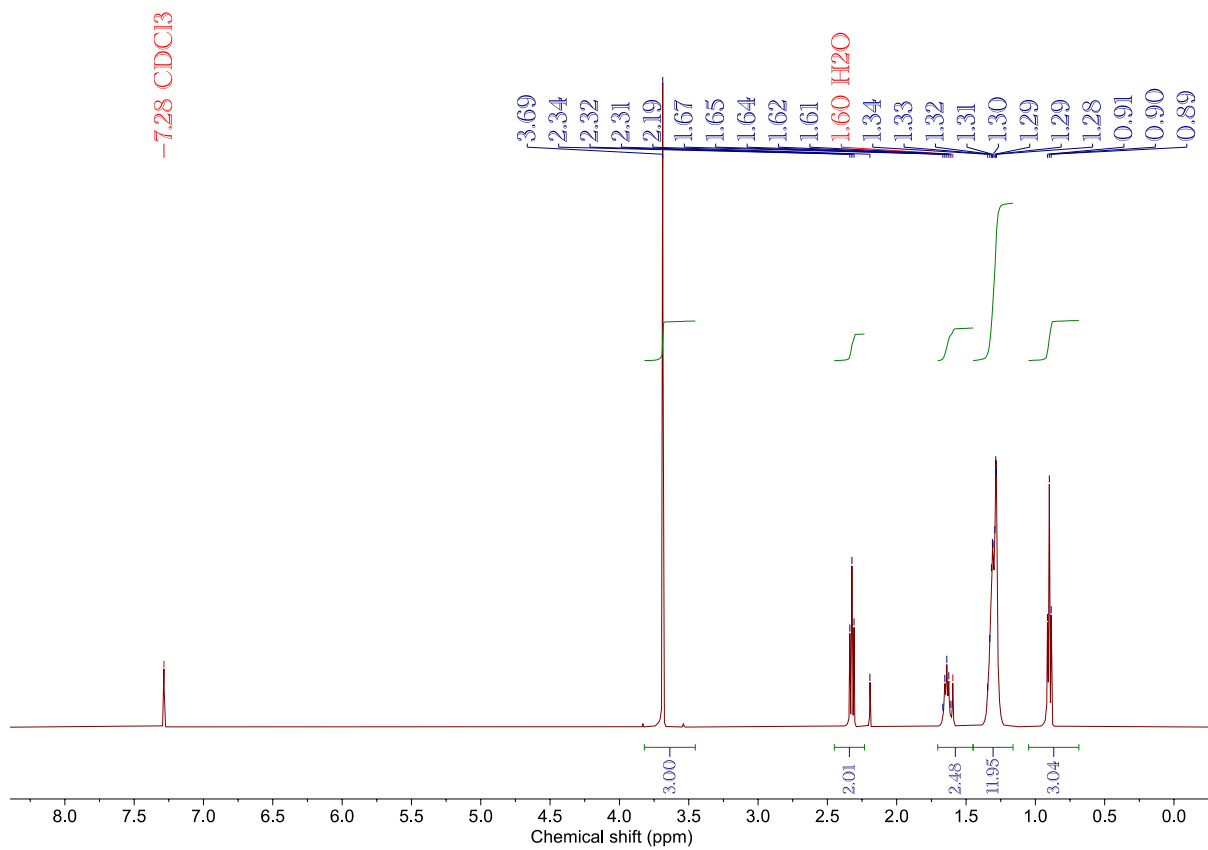

Supplement: RA-014-D4RA01469C-s001.pdf [file RA-014-D4RA01469C-s001.pdf]
